# Supplementary material
Source: publisher figshare collection journal article supplement (https://acs.figshare.com/ndownloader/files/25730083)
Supplement: Supplementary file 1 [file 25730083]

# Constructive Optimization of a Multi-Enzymatic Film based on a Cascade Reaction for Electrochemical Biosensors

Kai Sasaki<sup>1,2</sup>, Hiroyuki Furusawa<sup>2,3,4\*</sup>, Kuniaki Nagamine<sup>1,4</sup>, and Shizuo Tokito<sup>1,4\*</sup>

<sup>1</sup>Graduate School of Organic Materials Science, Yamagata University, 4-3-16 Jonan, Yonezawa, Yamagata 992-8510

<sup>2</sup>Innovative Flex Course for Frontier Organic Material Systems (iFront), Yamagata University, 4-3-16 Jonan, Yonezawa, Yamagata 992-8510

<sup>3</sup>Institute for the Promotion of General Graduate Education (IPGE), Yamagata University, 4-3-16 Jonan, Yonezawa, Yamagata 992-8510

<sup>4</sup>Research Center for Organic Electronics (ROEL), Yamagata University, 4-3-16 Jonan, Yonezawa, Yamagata 992-8510

E-mail: hfurusaw@yz.yamagata-u.ac.jp (H.F.); tokito@yz.yamagata-u.ac.jp (S.T.)

## Supporting Information

### Table of Contents

Figure S1: Linear plots for the initial rate values of  $\Delta E$  measured by (a) the normal-sequential layered film electrode, (b) the mixed film electrode, and (c) the reverse-sequential layered film electrode.

Figure S2: Linear plots for the initial rate values of  $\Delta E$  measured by (a) the mixed film electrode and (b) the three layered film electrode.

Figure S3: Scanning electron microscopy images of electrode surfaces.

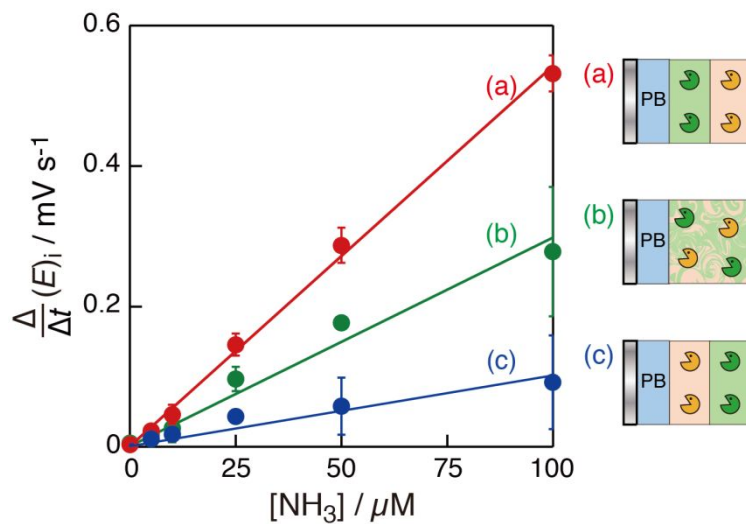

**Figure S1.** Linear plots for the initial rate values of  $\Delta E$  measured by (a) the normal-sequential layered film electrode, (b) the mixed film electrode, and (c) the reverse-sequential layered film electrode. The measurements were carried out at 25 °C in a 100 mM phosphate buffer solution (pH 8.0) containing 200 mM KCl, 2 mM NADPH, and 5 mM  $\alpha$ -KA for the  $\text{NH}_3$  detection (5–100  $\mu\text{M}$ ). The error bars indicate the standard deviation ( $n = 3$ ). The lines a and b are the same as those in Figure 4B line d and Figure 3B line d for ease of comparison, respectively.

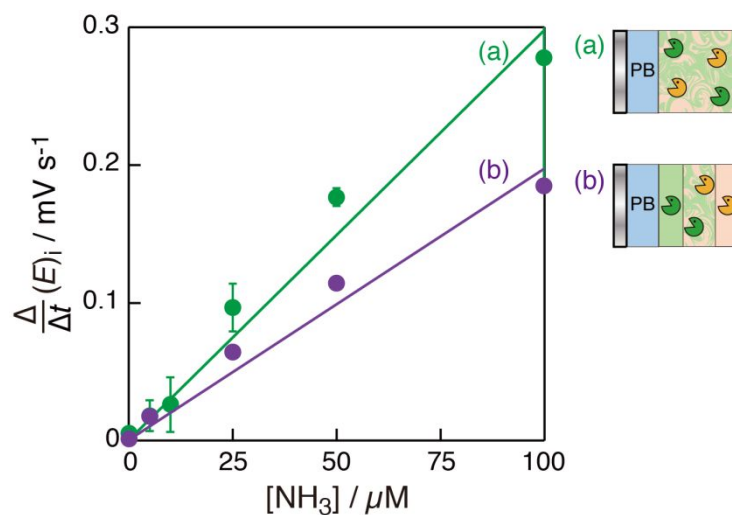

**Figure S2.** Linear plots for the initial rate values of  $\Delta E$  measured by (a) the mixed film electrode and (b) the three layered film electrode. The measurements were carried out at 25 °C in a 100 mM phosphate buffer solution (pH 8.0) containing 200 mM KCl, 2 mM NADPH, and 5 mM  $\alpha$ -KA for the  $\text{NH}_3$  detection (5 –100  $\mu\text{M}$ ). The error bars indicate the standard deviation ( $n = 3$ ). There are no error bars for (b). The line a is the same as that in Figure 3B line d for ease of comparison.

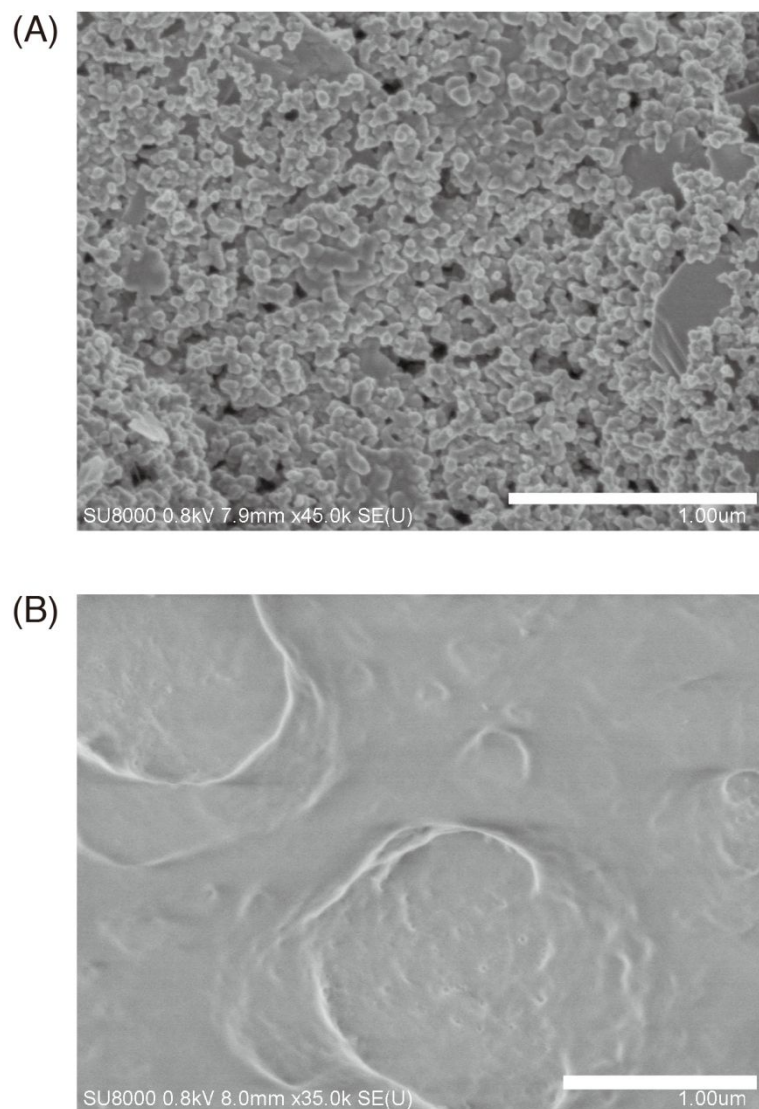

**Figure S3.** Scanning electron microscopy images of surfaces of (A) a bare PB-carbon electrode and (B) an electrode covered by normal-sequential layered film. The scanning was carried out at acceleration voltage: 0.8 kV using SU8000 (Hitachi High-Tech Co., Ltd., Tokyo, Japan). The white scale bars indicate the 1  $\mu\text{m}$  width, respectively.
